# Supplementary material for: ddRADseq-assisted construction of a high-density SNP genetic map and QTL fine mapping for growth-related traits in the spotted scat (Scatophagus argus)
Source: BMC Genomics. 2020 Apr 3;21:278. doi: 10.1186/s12864-020-6658-1 (PMC7126399; doi:10.1186/s12864-020-6658-1)
Supplement: Supplementary file 1 — Additional file 1 : Table S1. The statistics of eight growth-related traits of S. argus full-sib family. BW: body weight; TL: total length; BL: body length; BH: body height; PD: pre-dorsal length; PA: pre-anal length; HL: head length; CPH: caudal peduncle height; SD: standard deviation; CV: coefficient of variation. [file 12864_2020_6658_MOESM1_ESM.xlsx]

## Sheet: Sheet1
Traits	Minimum	Maximum	Skewness	Kurtosis	Mean	SD	CV (%)
BW (g)	45.2	156.6	0.74	0.69	81.906	17.751	21.67
TL (cm)	11.847	17.689	0.36	0.02	14.605	0.955	6.54
BL (cm)	9.963	15.085	0.34	0	12.399	0.849	6.85
BH (cm)	5.839	9.045	0.42	0.17	7.1	0.552	7.78
PD (cm)	2.891	5.027	0.38	0.28	3.723	0.342	9.2
PA (cm)	6.784	10.114	0.46	0.19	8.183	0.6	7.34
HL (cm)	2.251	3.843	0.43	0.55	3.051	0.251	8.21
CPH (cm)	1.273	2.027	0.52	0.59	1.585	0.12	7.56
